# Supplementary material for: Platelets Increase the Expression of PD-L1 in Ovarian Cancer
Source: Cancers (Basel). 2022 May 19;14(10):2498. doi: 10.3390/cancers14102498 (PMC9139585; doi:10.3390/cancers14102498)

SF+PLT 4hr-2 Actin

Figure 2c Actin

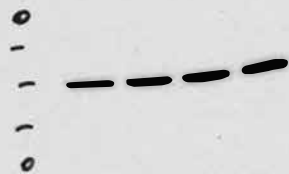

SF+PLT 15hr-2 Actin

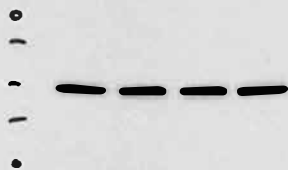

SF+PLT 24hr-2 Actin

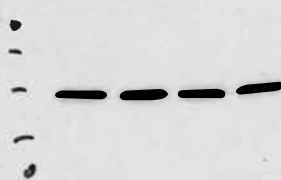

SF+PLT 48hr-2 Actin

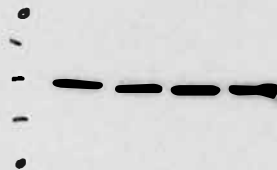

SF+PLT-1 Actin

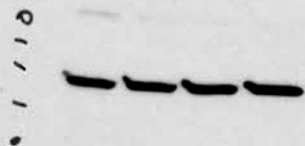

SF+PLT-2 Actin

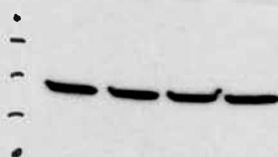

Figure 2c PD-L1

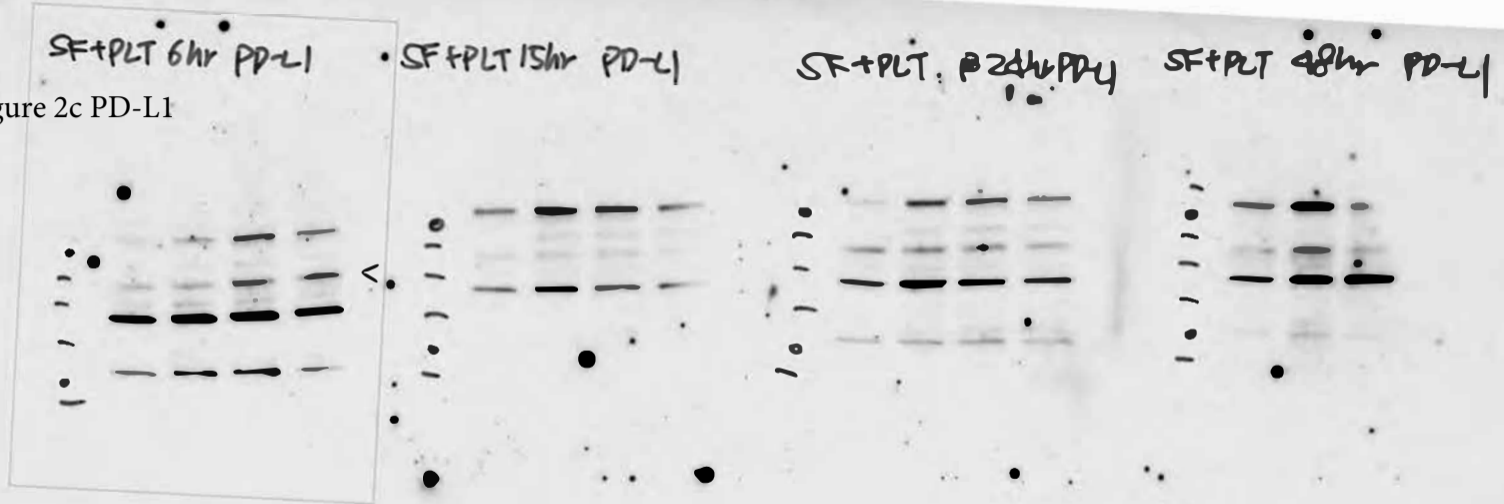

Figure 3a Actin

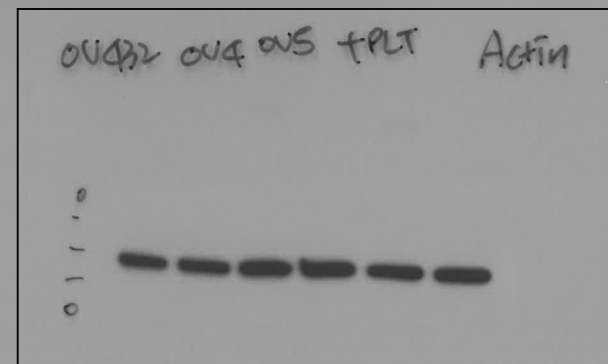

Fig3a Actin

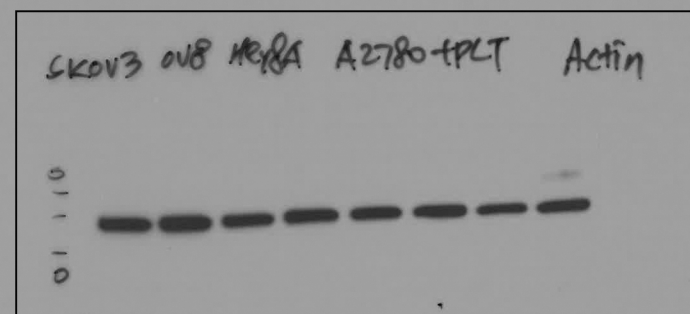

Figure 3a PD-L1

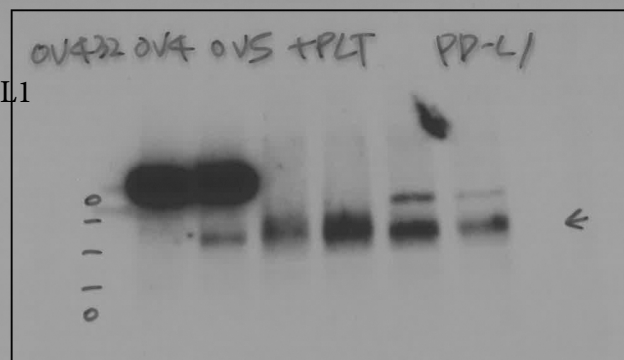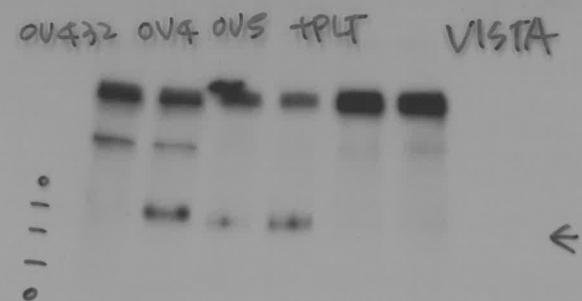

Figure 3a PD-L1

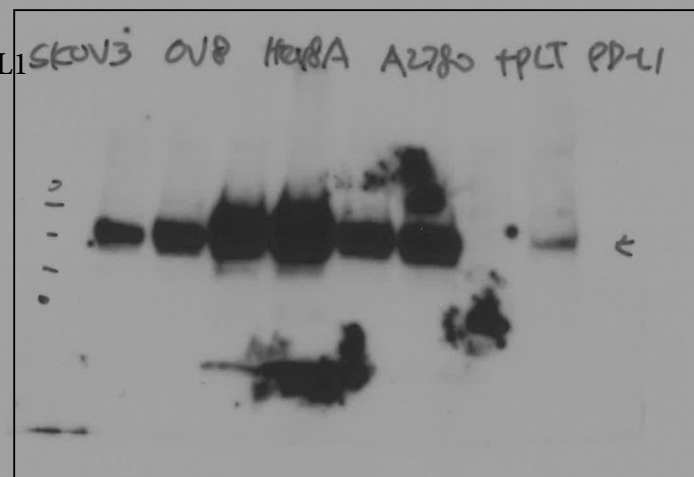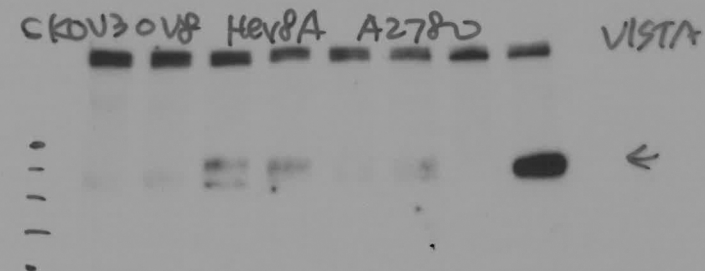



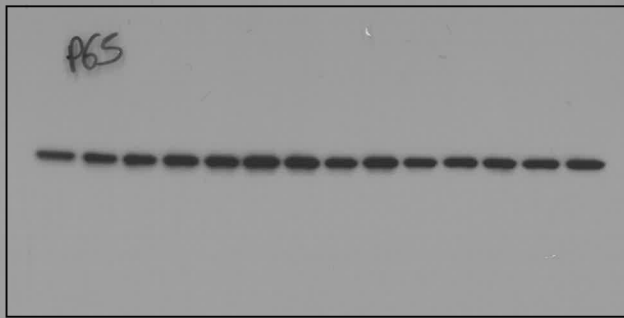

Figure 3b p65

Figure 3b Smad2/3

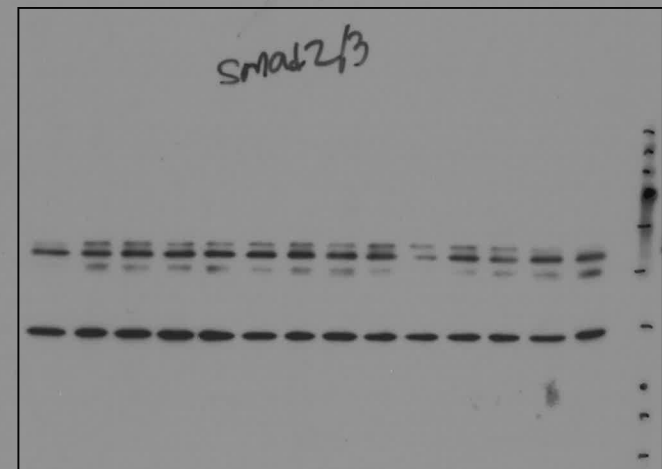

Figure 3b PD-L1

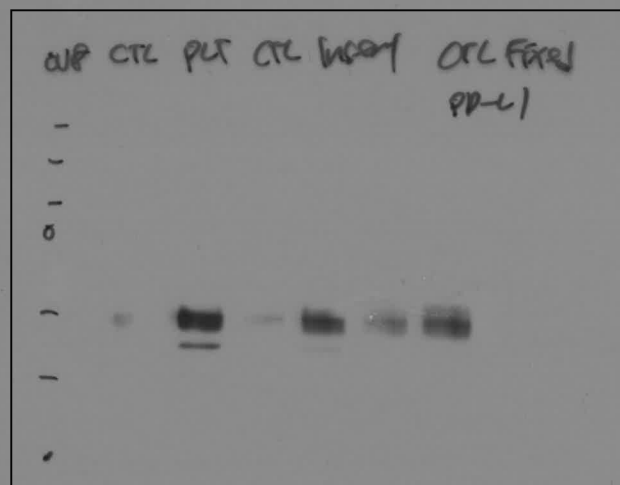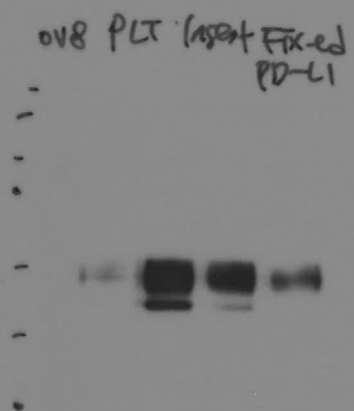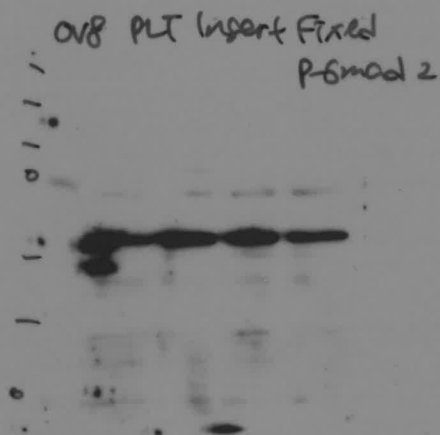

Figure 3b pP65

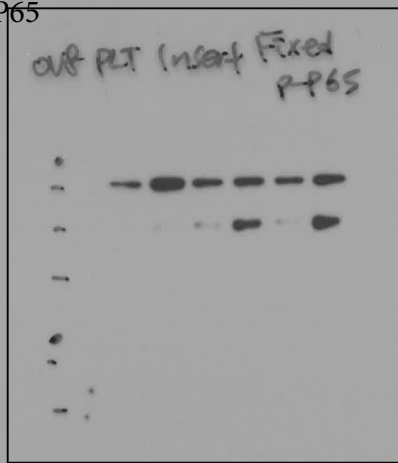

WT/TGF- $\beta$ /D  
PLT @129

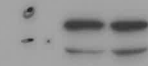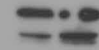

Figure 3b pSmad2

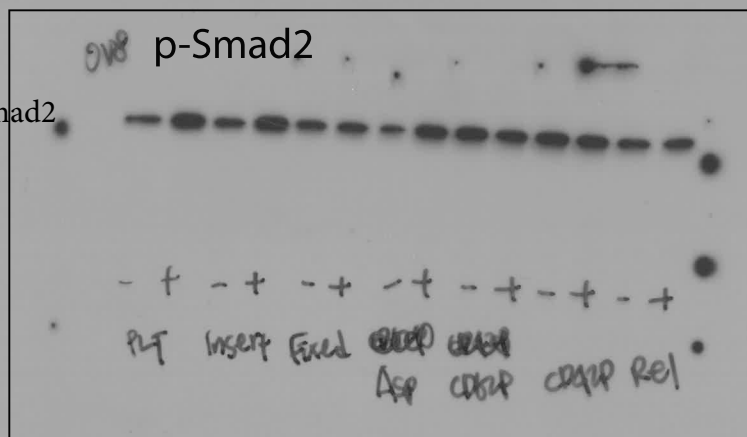

ov8 dose P-p65

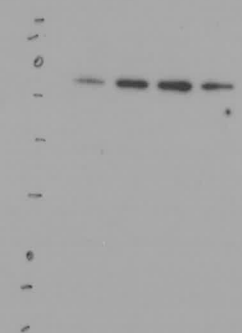

ov8 dose p-Smad2/3

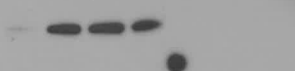

Figure 3c P65

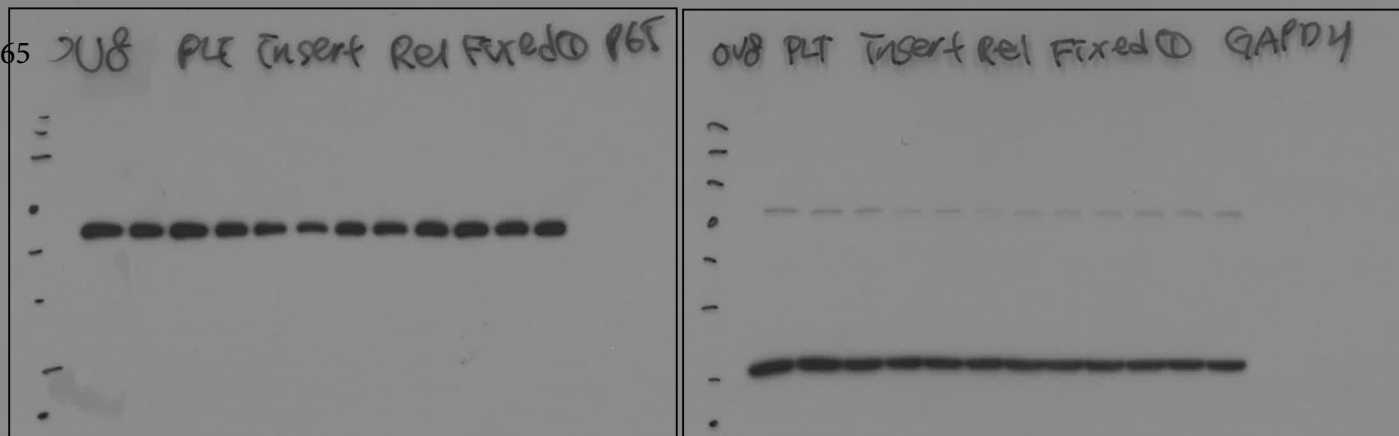

Fig3c GAPDH

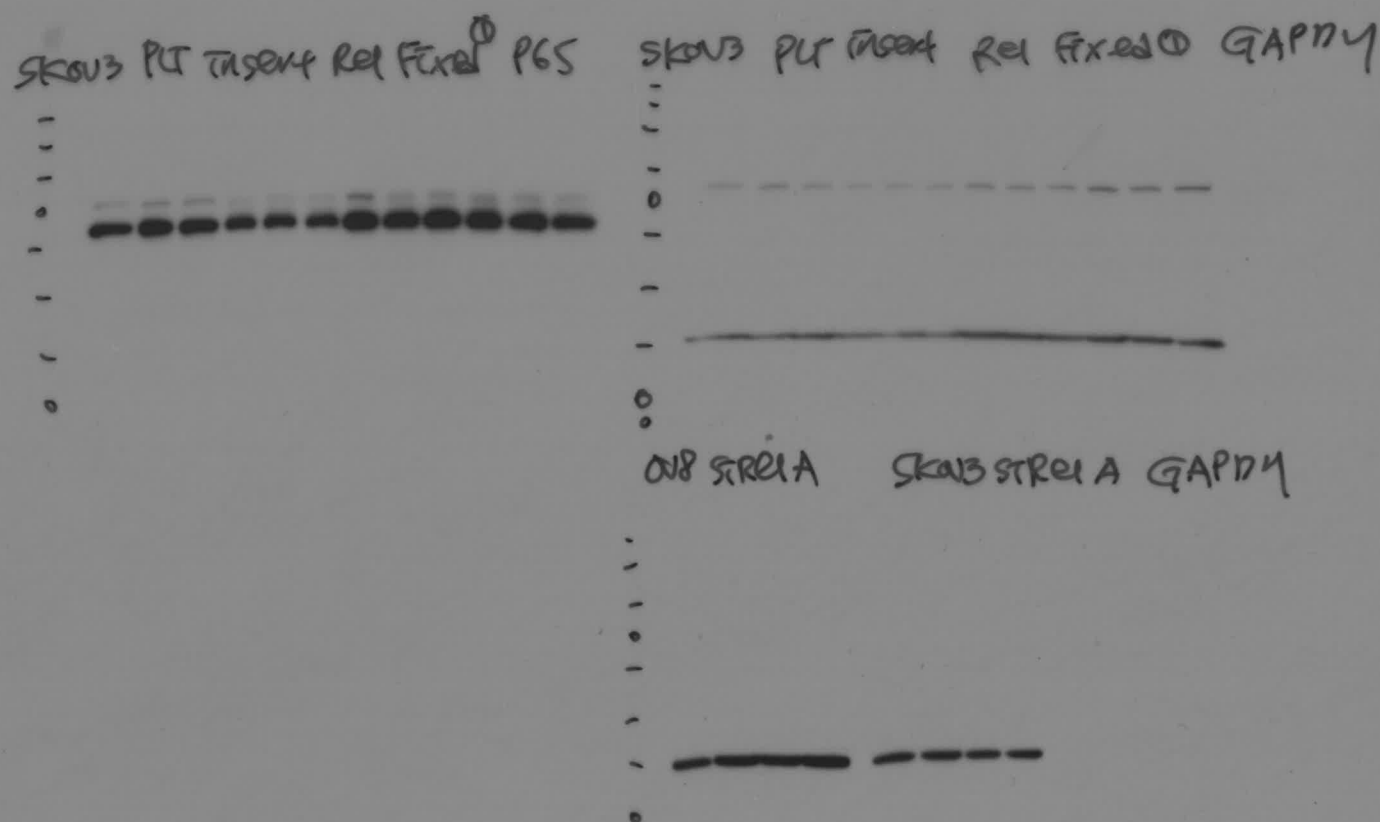

Figure 3c PD-L1

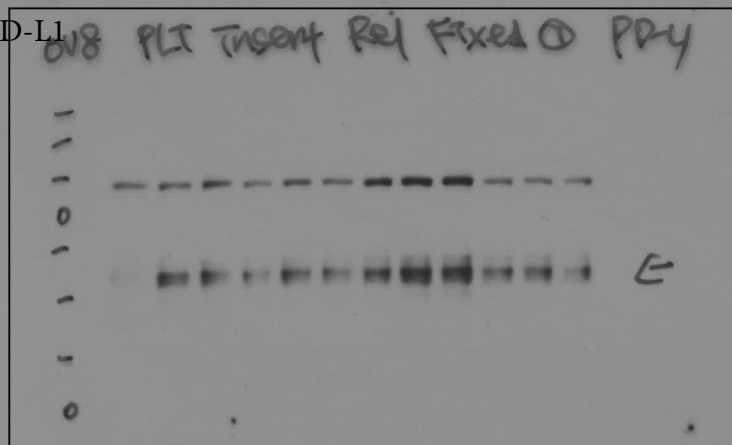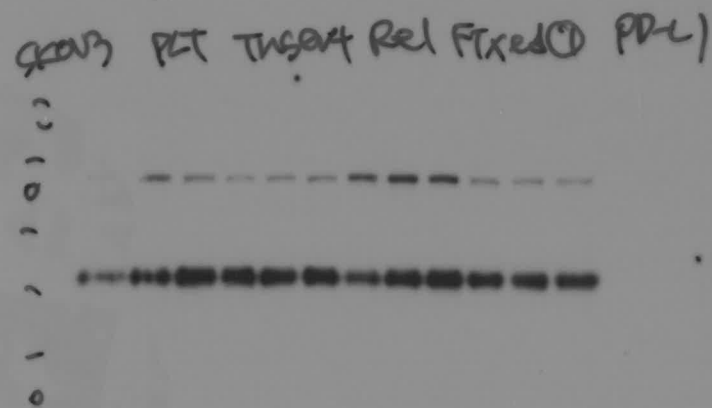

Figure 3c pP65

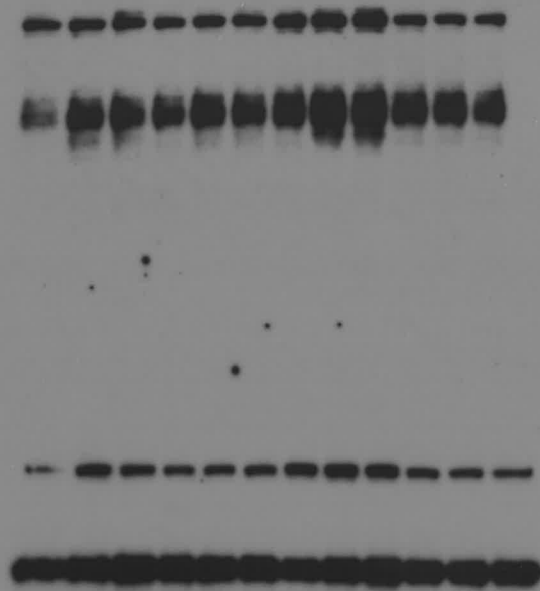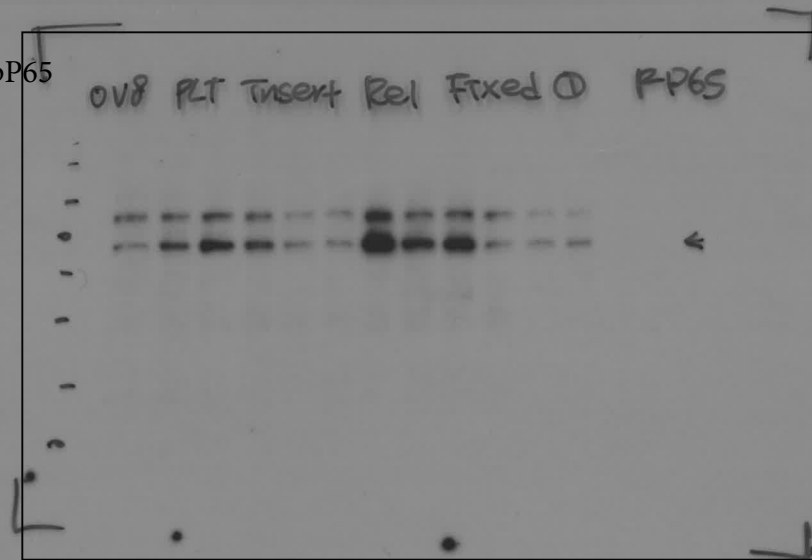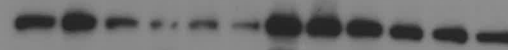

# GAPDH

OV8 SCS14

JSH23

Dose GAPDH

SKOV3 Dose

SCS14

JSH23  
GAPDH

Figure 3c SKOV3-GAPDH

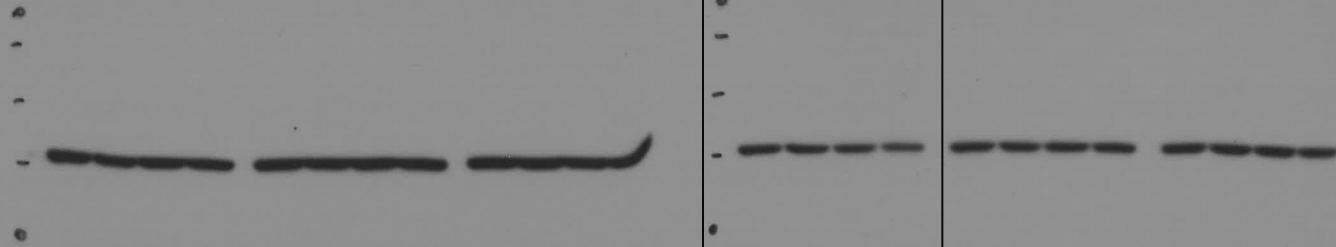

# p65

OV8 SCS14

JSH23

Dose p65

SKOV3 Dose

SCS14

JSH23  
p65

Figure 3c SKOV3-p65

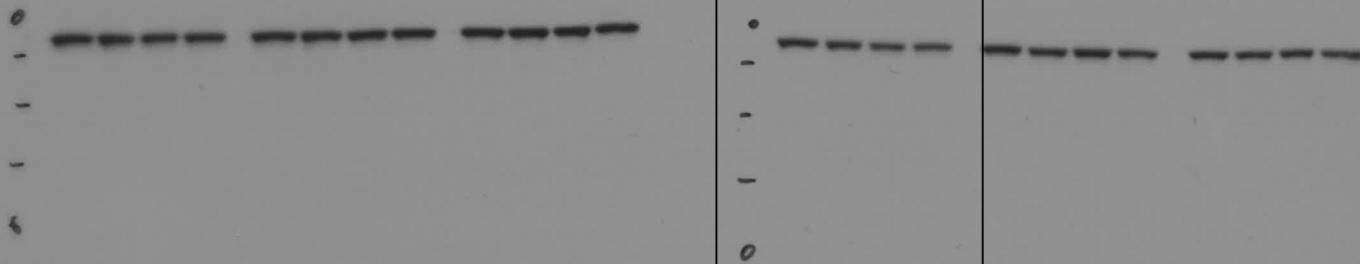

ov8 SCS14 JSH23 ov8 Dose PD-L1

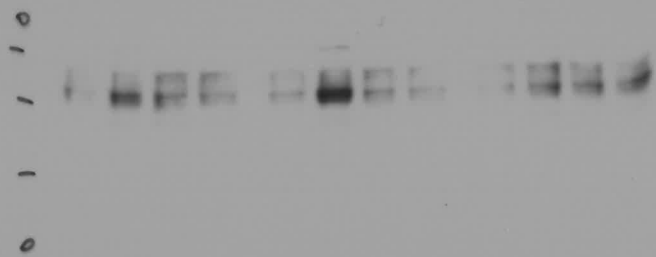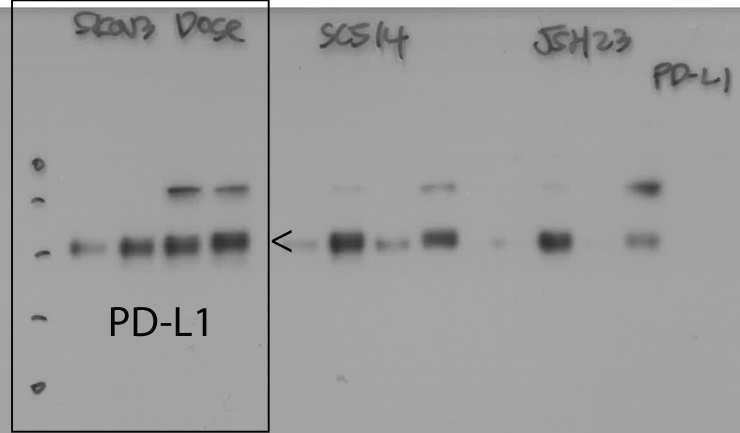

Figure 3c SKOV3-PD-L1

OV8 SCS14 JSH23 D052 PP65

SKOV3 D052

SCS14

JSH23

p-p65

Figure 3c SKOV3-pP65

208 PLE Insert Rel Fixed ① P65

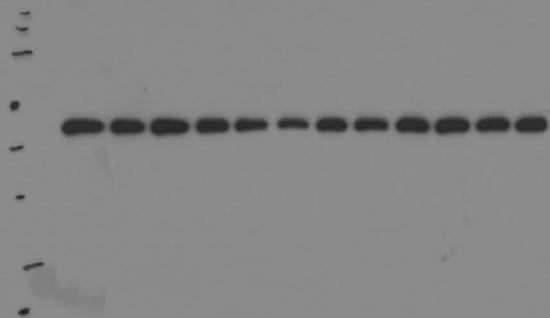

008 PLT Insert Rel Fixed ① GAPDH

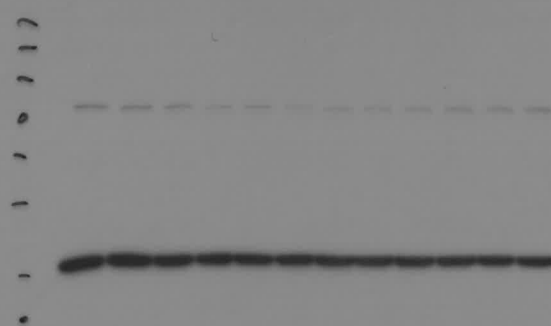

SK003 PLT Insert Rel Fixed ① P65

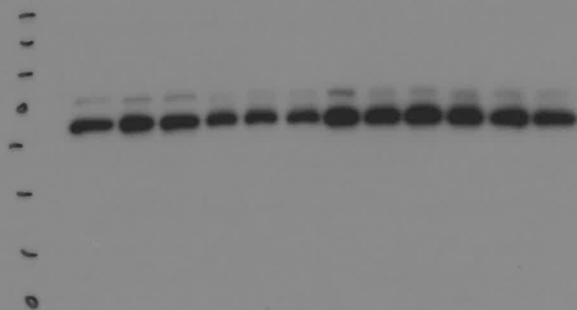

SK003 PLT Insert Rel Fixed ① GAPDH

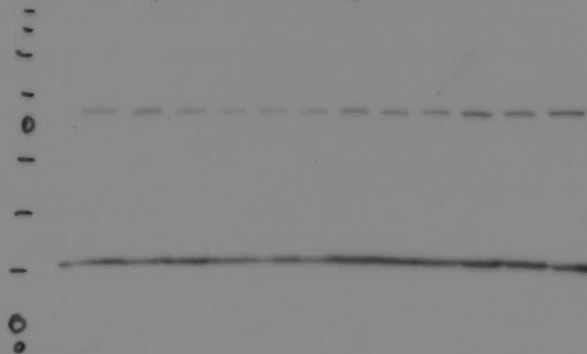

008 STRE1A SK003 STRE1A GAPDH

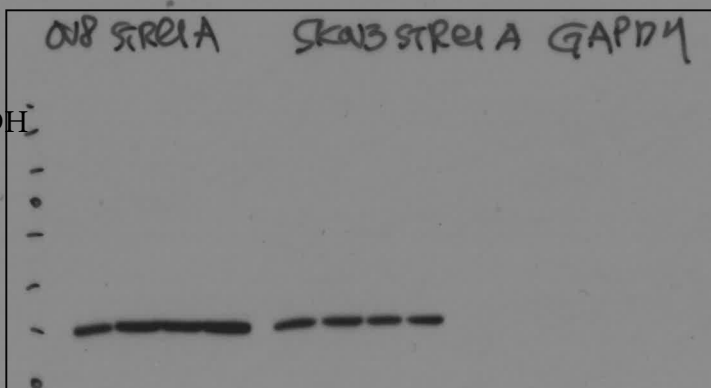

Figure 3d GAPDH

OV8 PLT / Insert / Rel / Fixed P-STAT1 SKOV3 PLT / Insert / Rel / Fixed P-STAT1

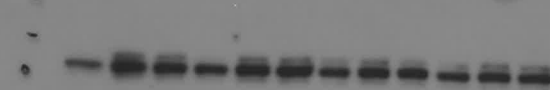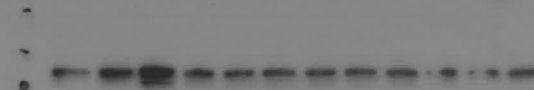

OV8 PLT / Insert / Rel Fixed P-STAT3

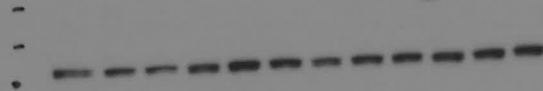

SKOV3 PLT / Insert / Rel Fixed P-STAT3

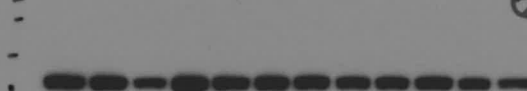

Figure 3d PD-L1

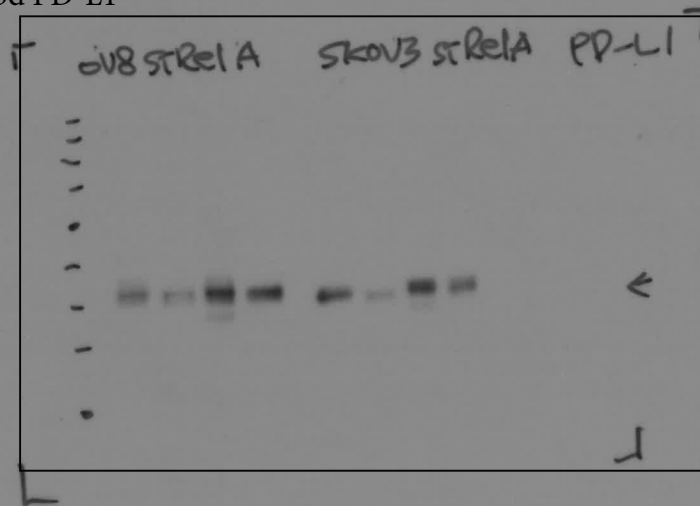

OV8 STRELA SKOV3 STRELA P65

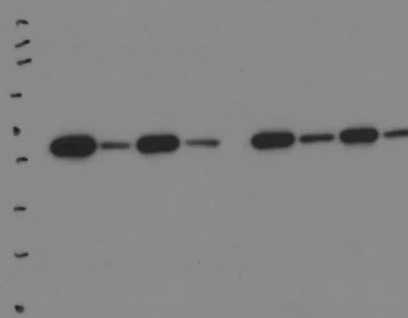

Figure 3d RelA

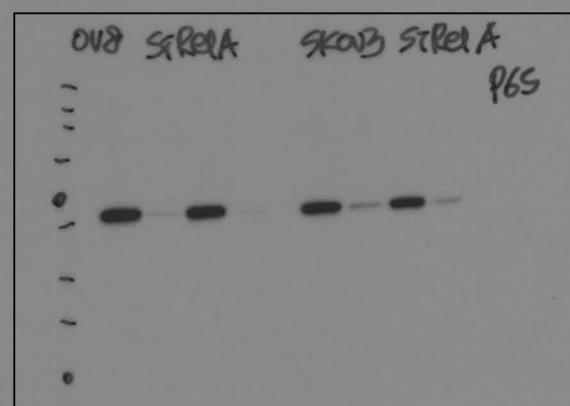

Figure 3e,f GAPDH

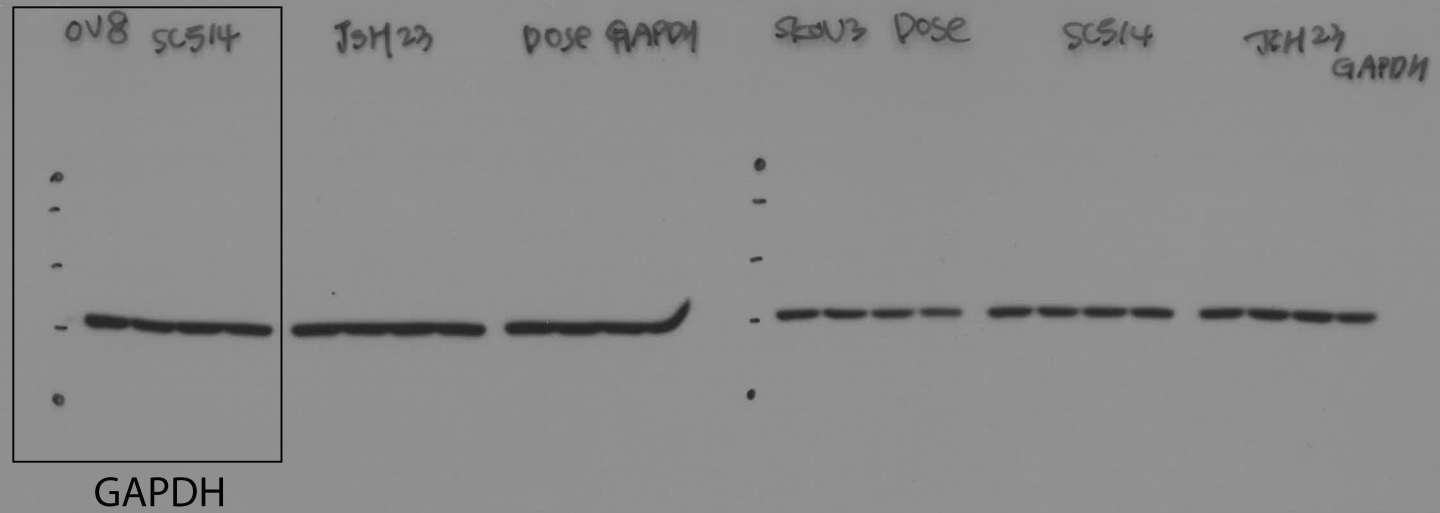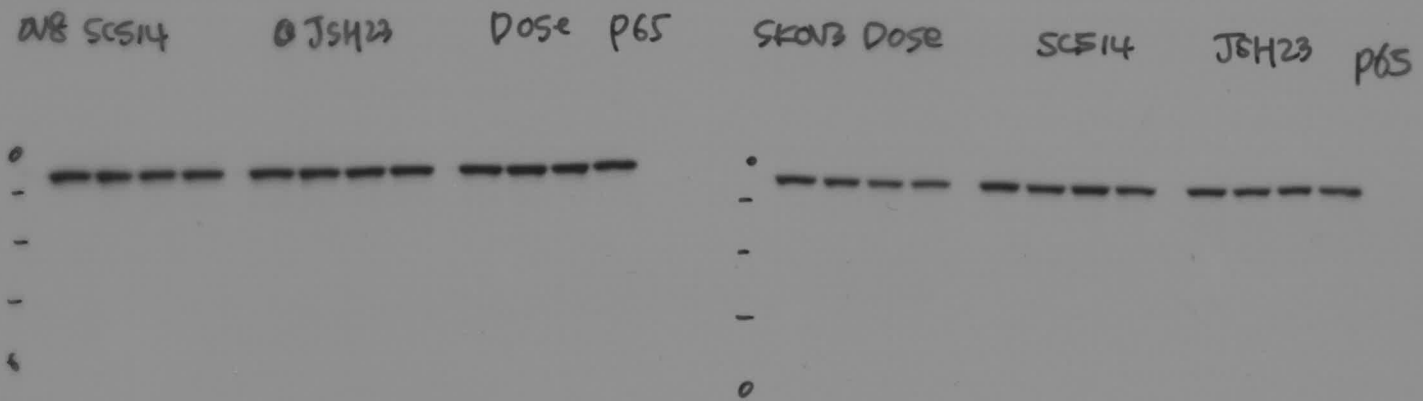

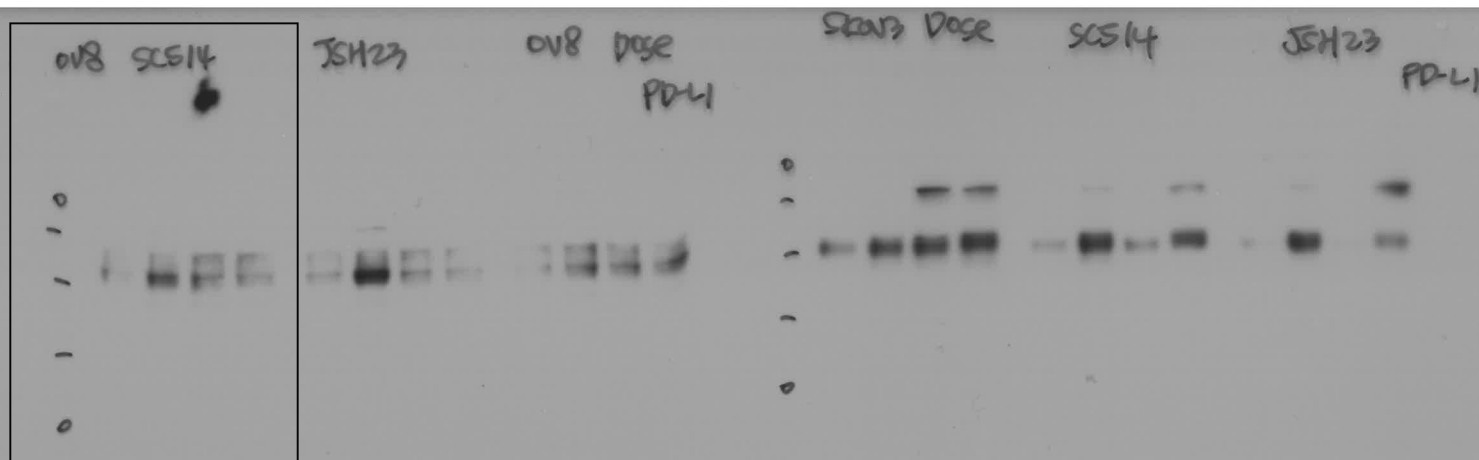

Figure 3e,f PD-L1 PD-L1

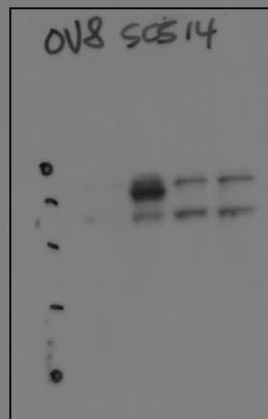

Figure 3e,f pP65 p-p65

Figure 3g GAPDH

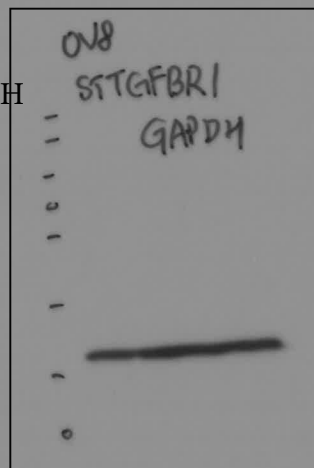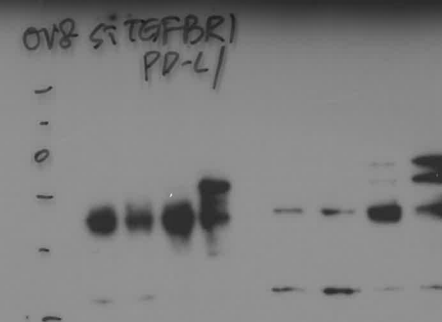

Figure 3g PD-L1

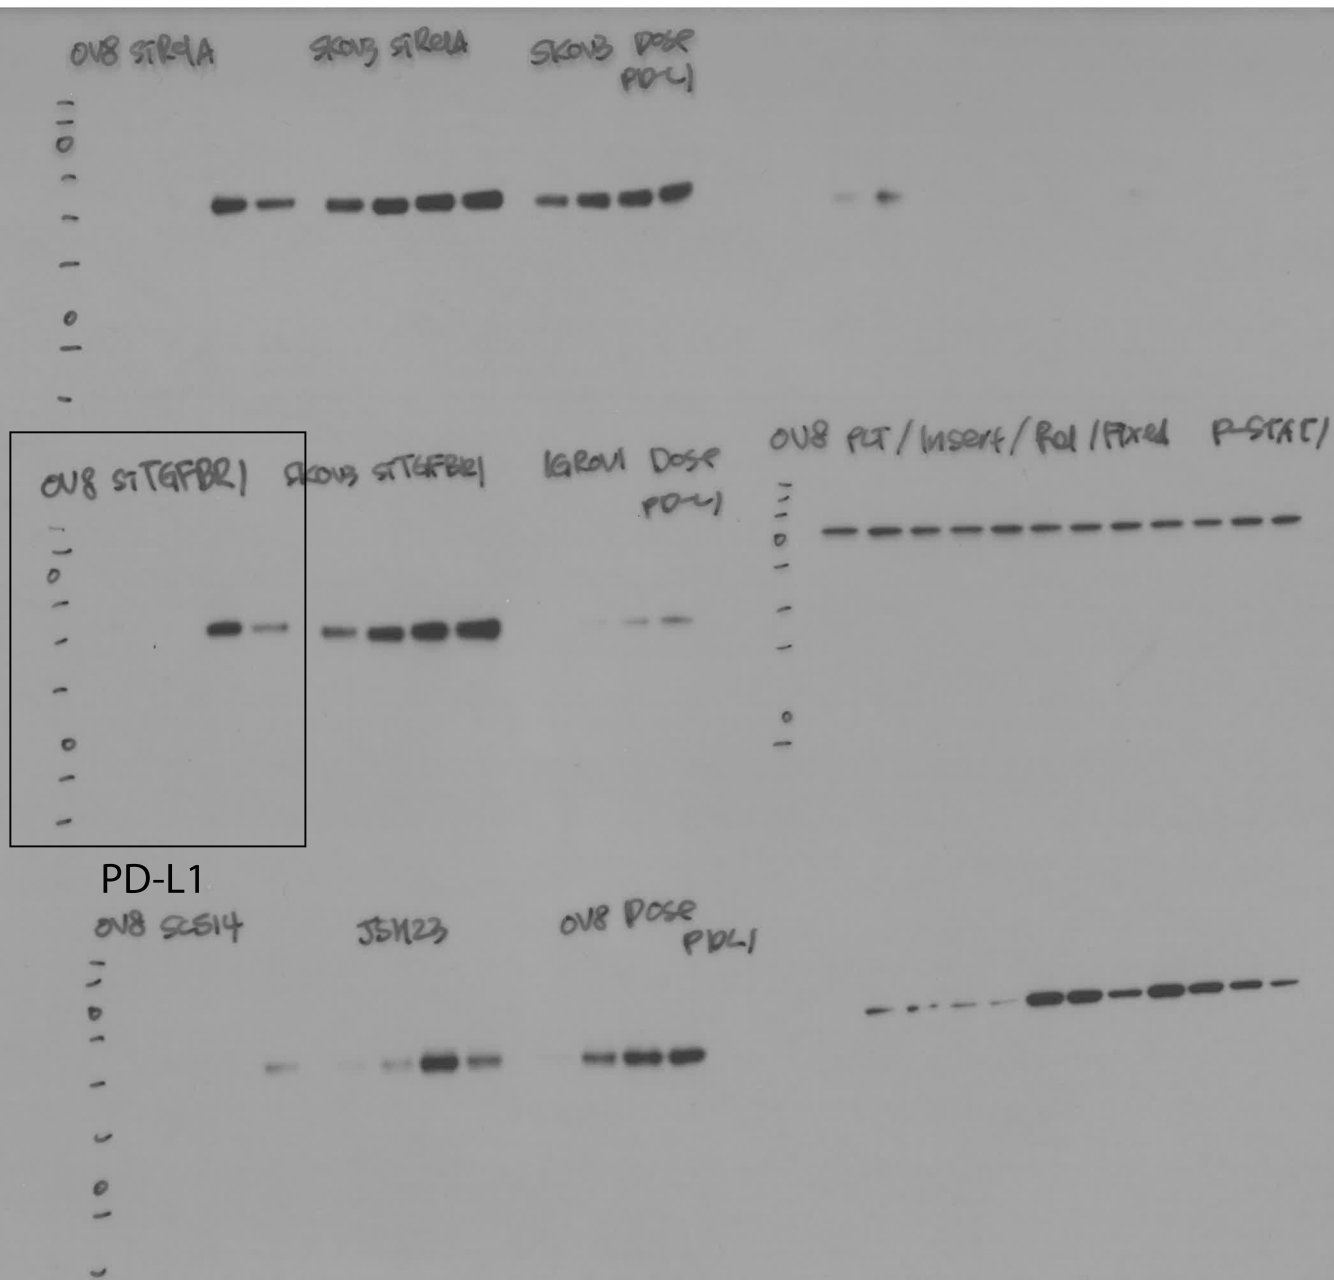

Figure 3g TGFbR1

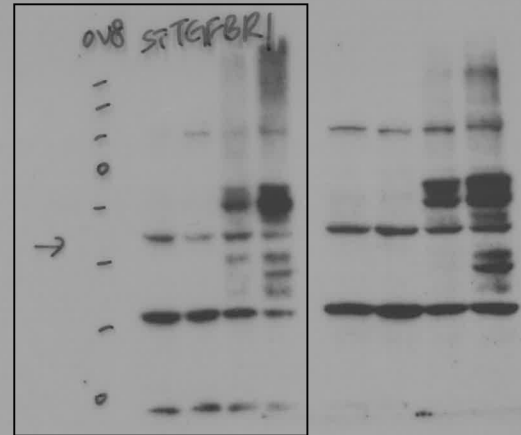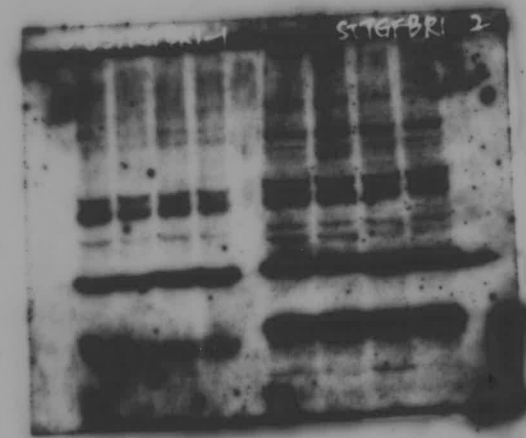

Figure 3h GAPDH

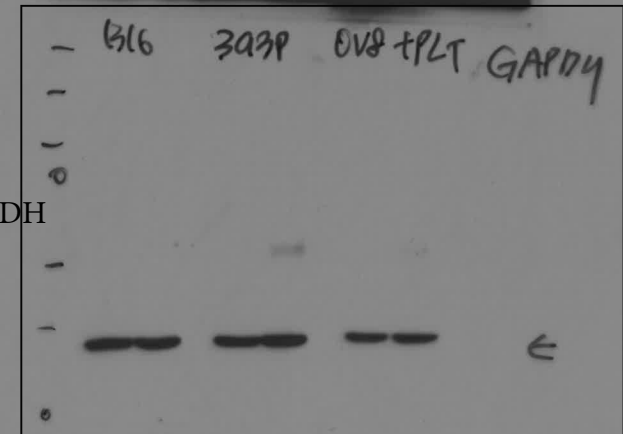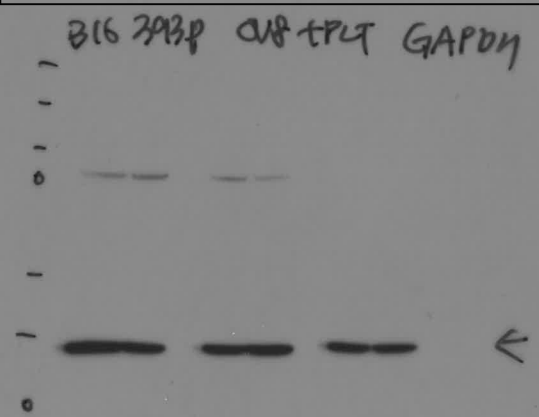

Figure 3h PD-L1

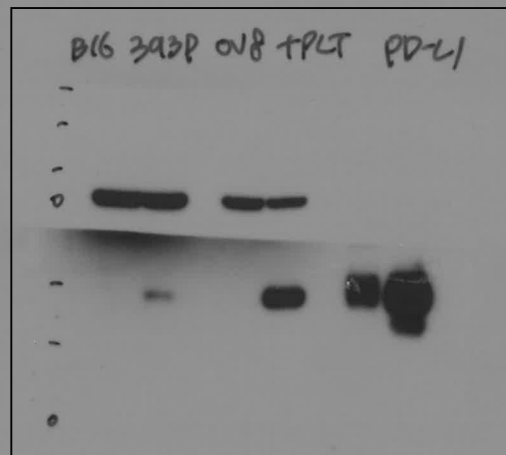

B16 3A3P O18 +PLT VISTA

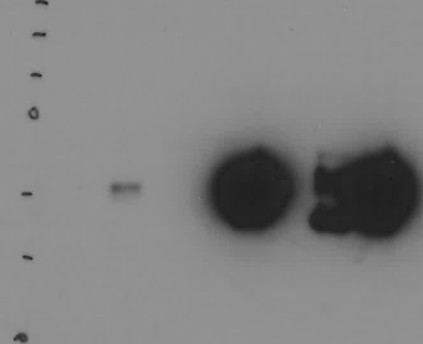

B16 3A3P O18 +PLT B7-H3

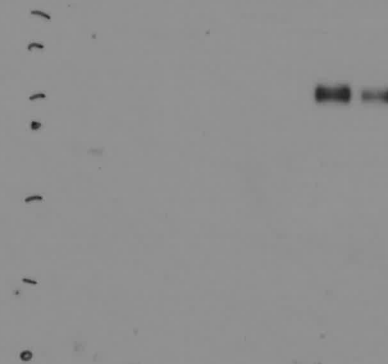

Figure 3i GAPDH

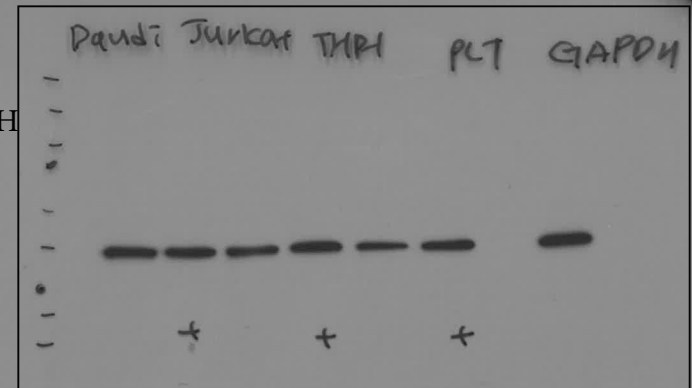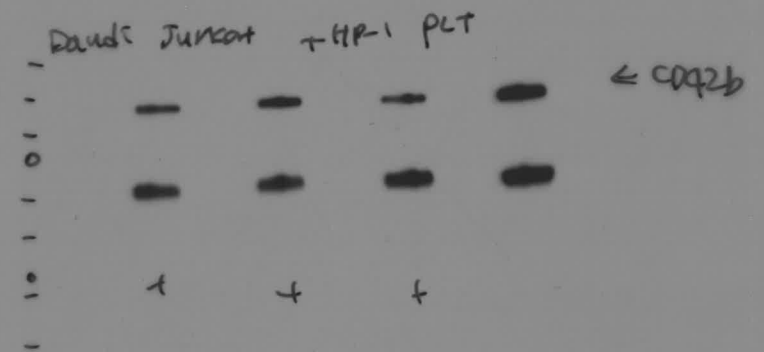

Figure 3i PD-L1

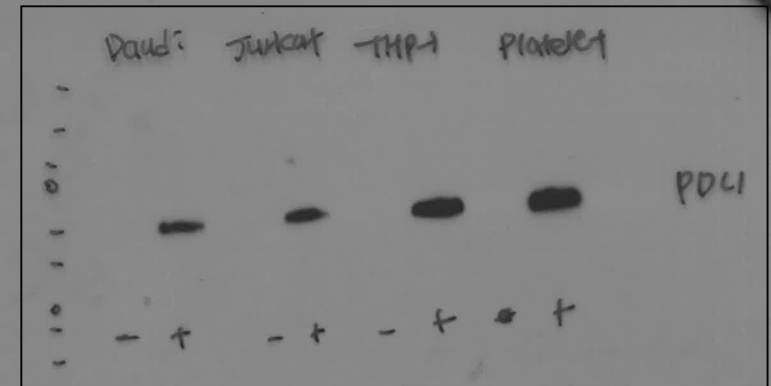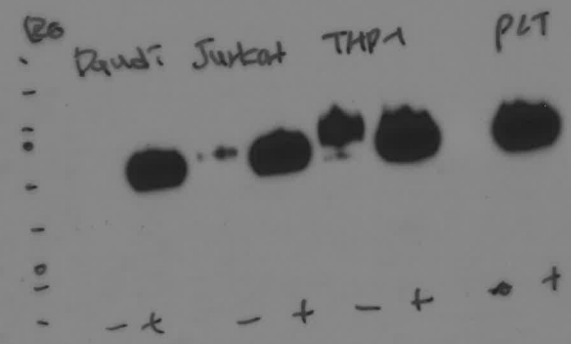

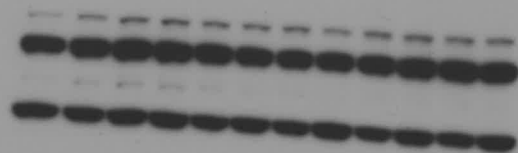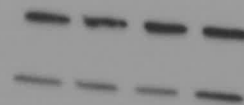

Supplementary Figure 1  
Actin

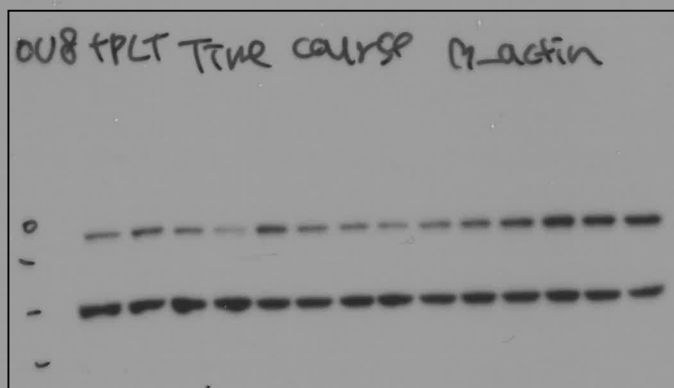

<

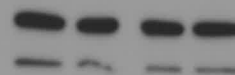

OVB+PLT Time course PD-L1

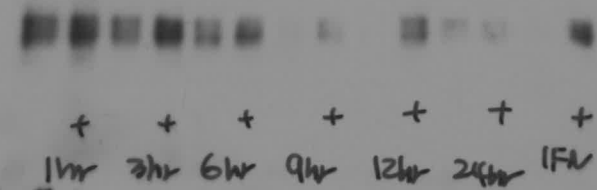

0V432 TPLT Time Course P-P65

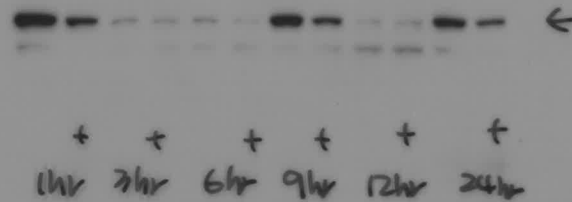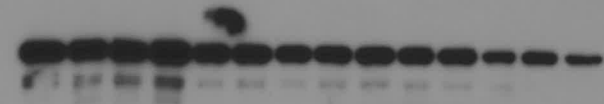

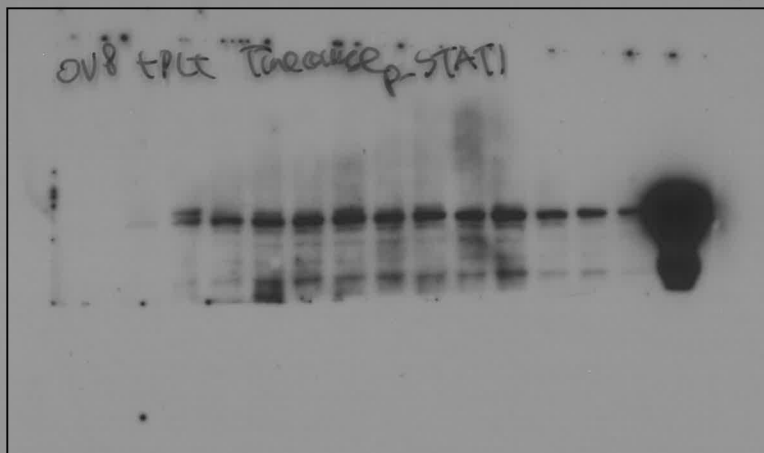

Supplementary Figure 1  
p-STAT1

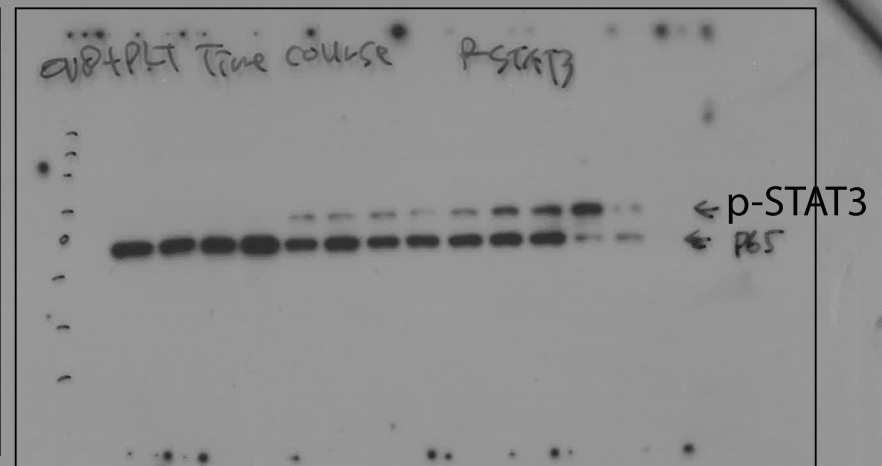

Supplementary Figure 1  
p-STAT3

OV8+PLT P65  
Timecourse

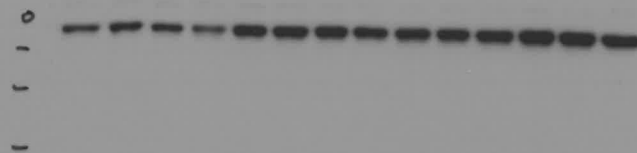

OV432+PLT P65  
Timecourse

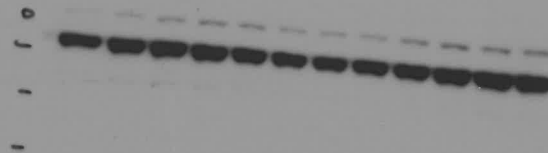

Supplementary Figure 1  
STAT1

OV8+PLT Timecourse STAT1

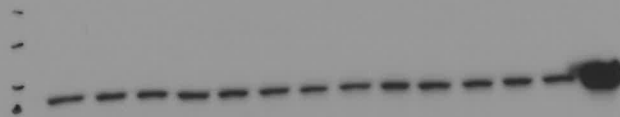

OV432+PLT Timecourse STAT1

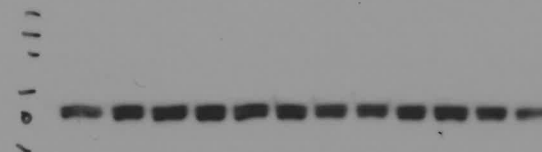

Supplementary Figure1  
STAT3

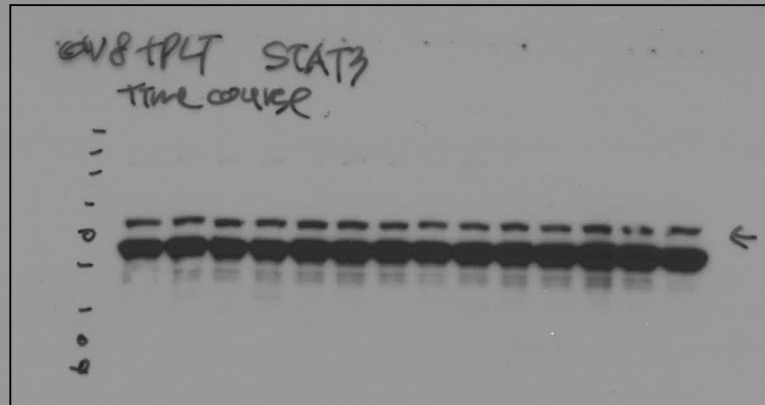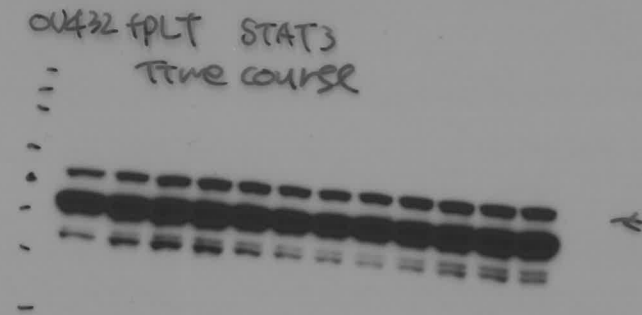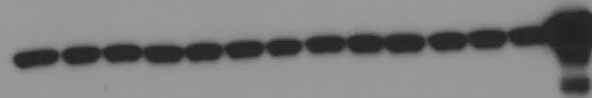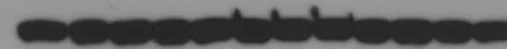

Supplement: Supplementary file 1 [file cancers-14-02498-s001.zip › Supplementary File S1.pdf]
