# Supplementary material for: Platelets Increase the Expression of PD-L1 in Ovarian Cancer
Source: Cancers (Basel). 2022 May 19;14(10):2498. doi: 10.3390/cancers14102498 (PMC9139585; doi:10.3390/cancers14102498)
Supplement: Supplementary file 1 [file cancers-14-02498-s001.zip › cancers-1715797-suppl Figures.pdf]

## Supplementary Data

### Platelets Increase the Expression of PD-L1 in Ovarian Cancer

**Min Soon Cho<sup>1\*</sup>, Hani Lee<sup>1#</sup>, Ricardo Gonzalez-Delgado<sup>1#</sup>, Dan Li<sup>2</sup>, Tomoyuki Sasano<sup>3</sup>, Wendolyn Carlos-Alcalde<sup>1</sup>, Qing Ma<sup>2</sup>, Jinsong Liu<sup>4</sup>, Anil K. Sood<sup>3</sup>, Vahid Afshar-Kharghan<sup>1</sup>**

<sup>1</sup>Section of Benign Hematology, University of Texas MD Anderson Cancer Center, Houston, Texas, USA

<sup>2</sup>Department of Hematopoietic Biology and Malignancy, University of Texas MD Anderson Cancer Center, Houston, Texas, USA

<sup>3</sup>Department of Gynecologic Oncology and Reproductive Medicine, University of Texas MD Anderson Cancer Center, Houston, Texas, USA

<sup>4</sup>Department of Pathology, University of Texas MD Anderson Cancer Center, Houston, Texas, USA

Running title: Platelets promote the expression of PD-L1 in ovarian cancer.

\* Correspondence: [mscho@mdanderson.org](mailto:mscho@mdanderson.org)

Min Soon Cho, PhD

<sup>1</sup>Section of Benign Hematology

MD Anderson Cancer Center

Z9.5042

6565 MD Anderson Blvd.

Houston, Texas 77030, USA

# Contributed equally to the manuscript

## SUPPLEMENTARY LEGENDS AND FIGURES

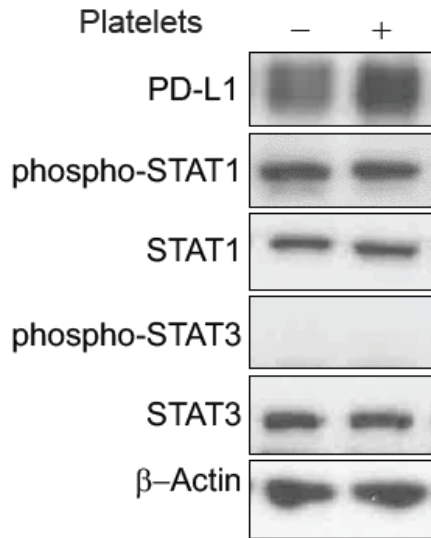

**Figure S1. Platelet-enhanced PD-L1 expression in ovarian cancer cells is independent of STAT1/3 phosphorylation.**

Whole-cell lysates from OVCAR8 ovarian cancer cells incubated with or without platelets were immunoblotted for PD-L1 and phosphorylated STAT1 and STAT3. Protein bands representing β-Actin, total STAT1, and STAT3 served as loading controls. The data is representative of three independent experiments.

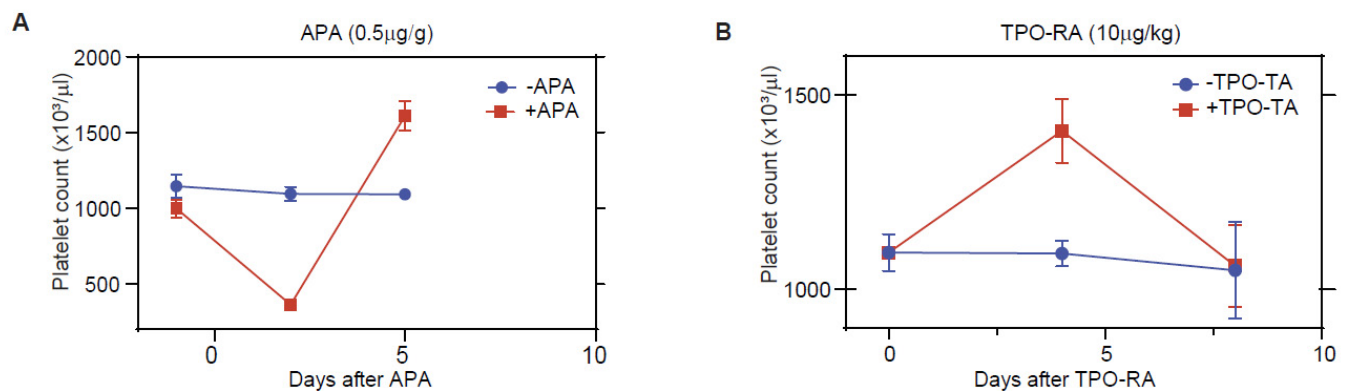

**Figure S2. Effect of antiplatelet antibody (APA) and murine thrombopoietin receptor agonist (TPO-RA) on platelet counts in mice.** We measured platelet counts at regular intervals in mice treated with (A) APA (0.5 μg/g) or (B) TPO-RA (10 μg/kg).

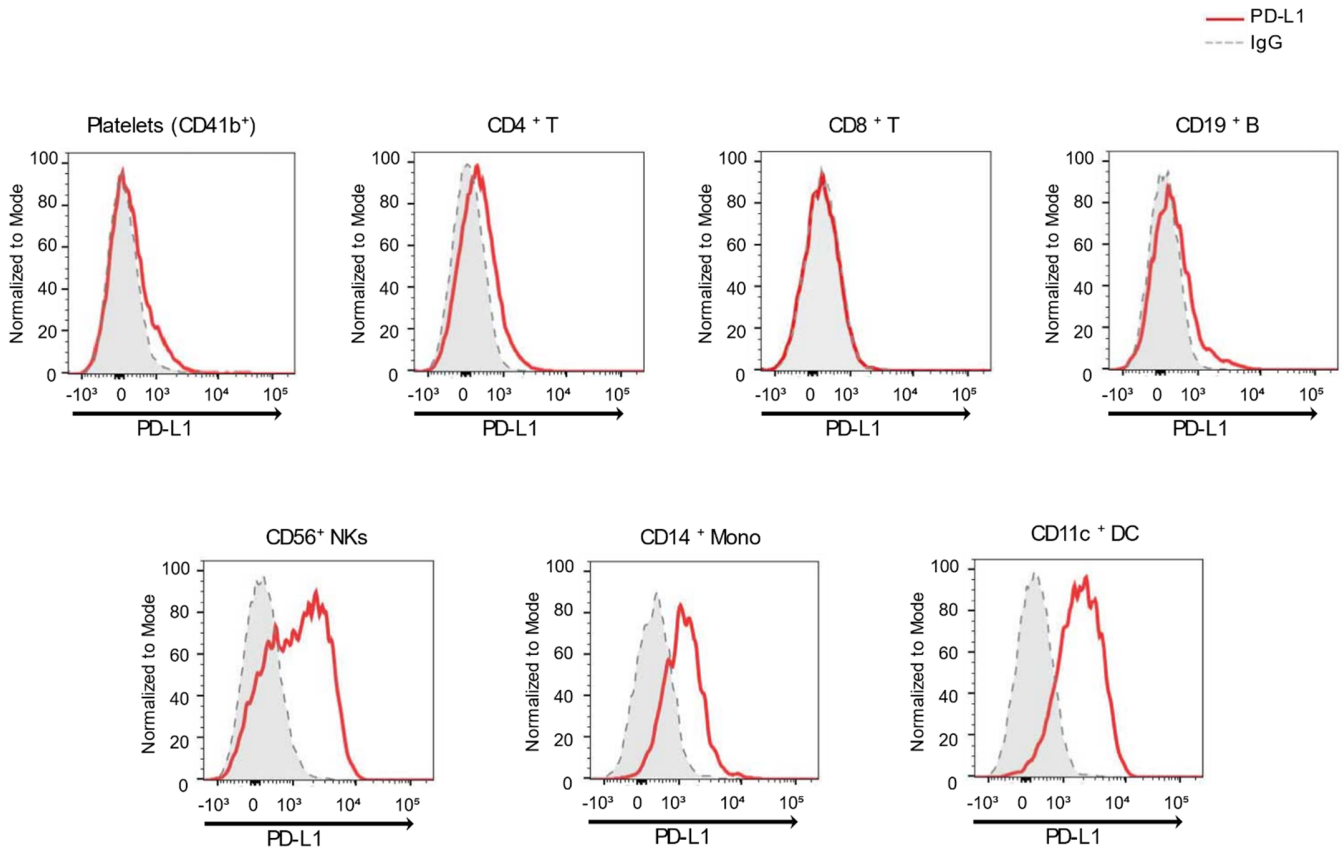

**Figure S3. Expression of PD-L1 on peripheral blood cells from a healthy donor.** We used flow cytometry to investigate the expression of PD-L1 on peripheral blood cells. We compared the binding of the anti-PDL-1 antibody to that of control IgG to CD41b<sup>+</sup> Platelets, CD4<sup>+</sup> T cells, CD8<sup>+</sup> T cells, CD19<sup>+</sup> B cells, CD56<sup>+</sup> Natural-Killer (NK) cells, CD14<sup>+</sup> monocytes (Mono), and CD11c<sup>+</sup> Dendritic cells (DC).

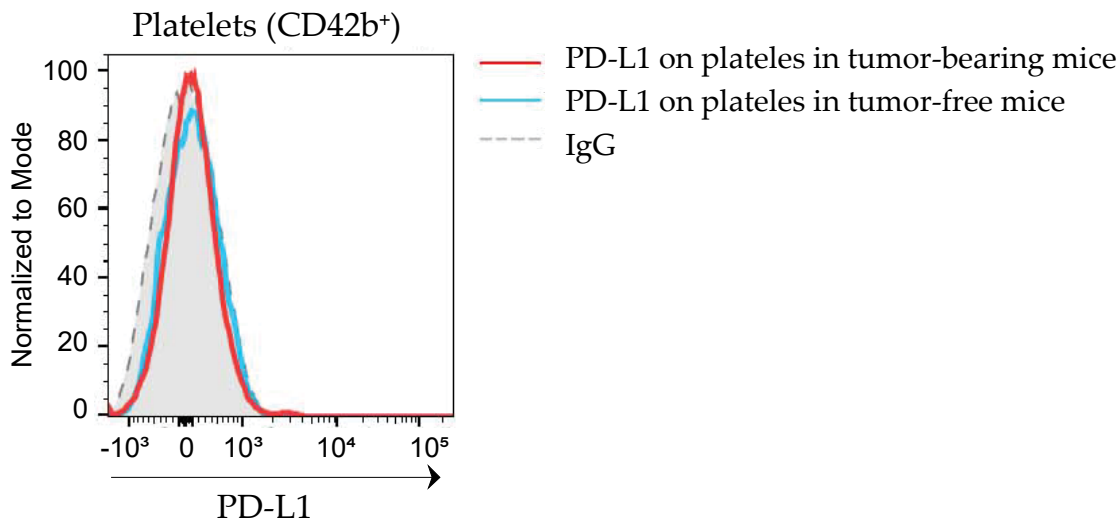

**Figure S4. Expression of PD-L1 on platelets in tumor-bearing and tumor-free mice.** We used flow cytometry to compare the binding of anti-PD-L1 or control IgG to CD42b<sup>+</sup> platelets from ovarian tumor-bearing mice or tumor-free mice.

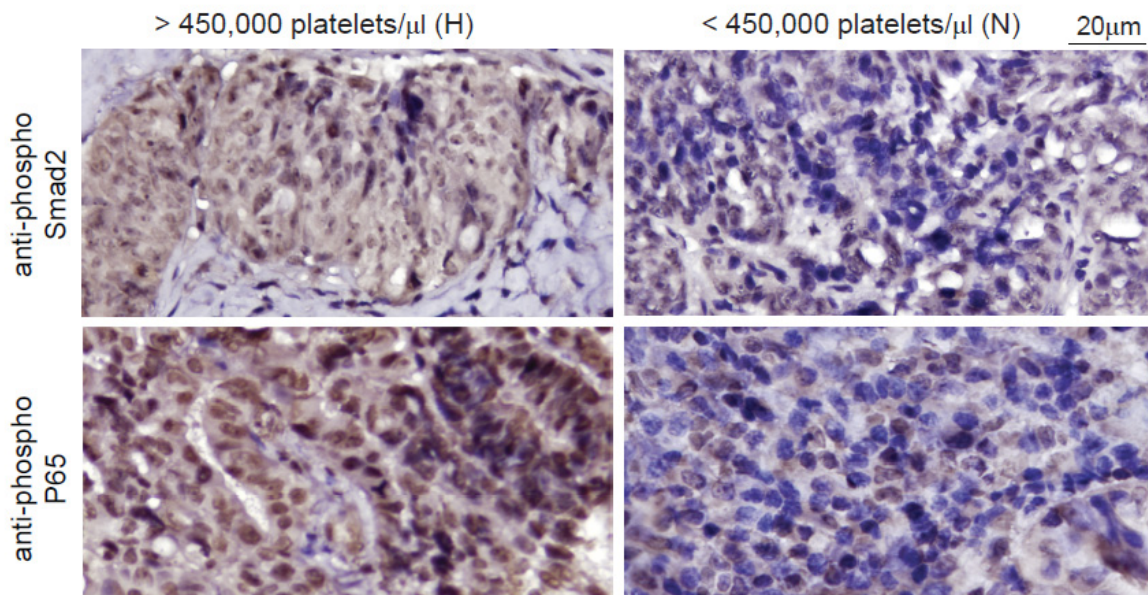

**Figure S5. Increase in the expression of Phospho-Smad2 and phospho-p65 expression in ovarian cancer tissue specimens in the presence of thrombocytosis.** We stained tumor specimens from patients with elevated and normal platelet counts with antibodies against phospho-Smad2 or phospho-p65.
