# Supplementary material for: Platelets Increase the Expression of PD-L1 in Ovarian Cancer
Source: Cancers (Basel). 2022 May 19;14(10):2498. doi: 10.3390/cancers14102498 (PMC9139585; doi:10.3390/cancers14102498)
Supplement: Supplementary file 1 [file cancers-14-02498-s001.zip › Supplementary Table File TS1. Densitometry.xlsx]

## Sheet: Fig3A
Actin	1	9526.06
	2	9861.82
	3	8713.94
	4	8496.99
	5	8464.35
	6	8297.94
	7	7424.99
	8	7766.06
	9	8241.77
	10	9029.53
	11	9750.35
	12	9724.41
PD-L1	1	6967.33	0.731396	1
	2	10394.1	1.05397	1.44104
	3	20727.2	2.37862	1
	4	25587	3.0113	1.26598
	5	13557.9	1.60176	1
	6	20294	2.44567	1.52686
	7	1468.36	0.197758	1
	8	1316.89	0.16957	0.85746
	1	10179.1	1.23506	1
	2	17933.8	1.98613	1.60812
	3	20980.2	2.15174	1.74221
	4	34984.5	3.5976	2.9129

## Sheet: Fig3B
GAPDH	1	25464.3
	2	32326.2
	3	27218.3
	4	19104.9
	5	20069
	6	21730.1
PD-L1	1	1864.48	0.0732191	1
	2	23477.7	0.726275	9.91919
	3	1710.65	0.0628491	0.85837
	4	14874.5	0.778571	10.6334
	5	6695.71	0.333635	4.55666
	6	16773.2	0.771889	10.5422
p-p65	1	1149.87	0.0451561	1
	2	21837.2	0.675525	14.9598
	3	122.95	0.00451717	0.100035
	4	940.598	0.0492333	1.09029
	5	23772.3	1.18453	26.2319
	6	15963.3	0.734616	16.2684
p65	1	18477.4	0.725619	1
	2	20562.9	0.636105	0.876637
	3	21984.3	0.807701	1.11312
	4	25108.2	1.31423	1.81118
	5	25207	1.25602	1.73096
	6	29409.2	1.35338	1.86514
p-smad2	1	14230.5	0.558839	1
	2	27305.5	0.844686	1.5115
	3	16579.6	0.609135	1.09
	4	26757.6	1.40056	2.50619
	5	17606.4	0.877294	1.56985
	6	18487.9	0.850797	1.52244
SMAD2	1	17795.4	0.698835	1
	2	20096.8	0.621686	0.889603
	3	23119.3	0.849401	1.21545
	4	21110	1.10495	1.58113
	5	19139.2	0.953669	1.36466
	6	18444.4	0.848796	1.21459

## Sheet: Fig3C
OV8
GAPDH	1	63767.7
	2	65110.2
	3	49163.9
PD-L1	1	8149.1	0.127794	1
	2	38554.7	0.592145	4.63361
	3	33986.5	0.69129	5.40943
p-p65	1	13238.6	0.207607	1
	2	28088.7	0.431403	2.07797
	3	45711.3	0.929775	4.47853
p65	1	52831.5	0.828499	1
	2	44418.9	0.682211	0.823431
	3	54076	1.09991	1.3276
SKOV3	1	42651.5
	2	39549.7
	3	35002
	4	28803.8
PD-L1	1	11386.8	0.266973	1
	2	25573.5	0.646616	2.42202
	3	30564.9	0.873234	3.27087
	4	36519.6	1.26788	4.74907
p-p65	1	860.435	0.0201736	1
	2	1466.82	0.037088	1.83844
	3	40373.7	1.15347	57.177
	4	40633.2	1.41069	69.9273
p65	1	38808.9	0.909908	1
	2	33083.4	0.836502	0.919326
	3	28061.7	0.801719	0.881099
	4	28781.7	0.999232	1.09817

## Sheet: Fig3D
OVCAR8						SKOV3
GAPDH	1	30087				GAPDH	1	30087
	2	45296.3					2	45296.3
	3	37745.6					3	37745.6
	4	50934.5					4	50934.5
p65	1	42977	1.42843	1		p65	1	44544.7	1.48053	1.03648
	2	1875.58	0.0414069	0.0289878			2	6554.74	0.144708	0.101306
	3	38115.8	1.00981	0.706938			3	34535.3	0.914948	0.640529
	4	1422.8	0.0279339	0.0195557			4	3739.28	0.0734135	0.0513947
PD-L1	1	14246.1	0.473497	1		PD-L1	1	28550.8	0.948943	2.00412
	2	7573.97	0.16721	0.353138			2	5389.1	0.118975	0.251268
	3	31129.5	0.824717	1.74176			3	30859.1	0.817555	1.72663
	4	26232.8	0.515031	1.08772			4	17589.4	0.345334	0.729327

## Sheet: Fig3E
GAPDH	1	44242.8
	2	39768.6
	3	42191.1
	4	39706.3
PD-L1	1	6223.3	0.140662	1
	2	29028.5	0.729936	5.18928
	3	20336.2	0.482003	3.42667
	4	11835.5	0.298075	2.11908
p-p65	1	838.799	0.018959	1
	2	37376	0.939837	49.5721
	3	4976.81	0.117959	6.22179
	4	4889.83	0.12315	6.4956
p65	1	40967.5	0.92597	1
	2	34692.3	0.872354	0.942098
	3	31958.6	0.757473	0.818032
	4	34215.9	0.861725	0.930619

## Sheet: Fig3F
GAPDH	1	45996.5
	2	44032.9
	3	44576.8
	4	46132
PD-L1	1	4299.71	0.0934791	1
	2	35669	0.810054	8.66561
	3	7997.15	0.179401	1.91916
	4	3403.98	0.0737879	0.789352
p-p65	1	1429.84	0.0310859	1
	2	36578.1	0.8307	26.7228
	3	11006.8	0.246917	7.94307
	4	12356.8	0.267858	8.61672
p65	1	41203.5	0.895795	1
	2	39286.2	0.892202	0.995989
	3	37344	0.837746	0.935198
	4	38847.4	0.842092	0.94005

## Sheet: Fig3G
siTGFBR1
GAPDH	1	34331.8
	2	47031.3
	3	43848.6
	4	42286.3
PD-L1	1	1199.41	0.0349357	1
	2	604.456	0.0128522	0.367881
	3	37345.9	0.851701	24.3791
	4	12269.1	0.290143	8.30506
TGFBR1	1	28405.1	0.827369	1
	2	13068.9	0.277877	0.335857
	3	35418	0.807734	0.976269
	4	28550.5	0.675172	0.816047

## Sheet: Fig3H
GAPDH	1	24175.6
	2	22520.7
	3	22485.4
	4	23896.1
	5	16487.4
	6	17902.9
PD-L1	1	3181.63	0.131605	1
	2	3996.13	0.177443	1.3483
	3	1283.14	0.0570656	1
	4	9270.28	0.387941	6.79816
	5	10617.5	0.64398	1
	6	24619.9	1.37519	2.13546

## Sheet: Fig3I
GPADH	1	27234.9
	2	24112.8
	3	20818.2
	4	24387.7
	5	16863.5
	6	22573.7
PD-L1	1	711.435	0.0261222	1
	2	13196.6	0.547285	20.951
	3	519.971	0.0249767	1
	4	12668.3	0.519453	20.7975
	5	31.243	0.0018527	1
	6	24649.2	1.09194	589.382

## Sheet: Fig2C
Actin	1	32546.7
	2	37141.3
	3	41046.3
	4	42593.1
PD-L1	1	7663.17	0.235452	1
	2	9905.7	0.266703	1.13273
	3	30417.9	0.741063	3.14741
	4	27775.1	0.652105	2.76959

[truncated: 1 more sheets: Fig S1]
